# Supplementary material for: In ovo chorioallantoic membrane assay as a xenograft model for pediatric rhabdomyosarcoma
Source: PubMed Central journal article supplement — Oncol Rep. 2023 Mar 2;49(4):76. doi: 10.3892/or.2023.8513 (PMC10018452; doi:10.3892/or.2023.8513), 2023-03-02

## Data S1

*Immunocytochemistry.* Sterilized perforated slide glasses were coated with 0.1 mg/ml poly-L-lysine (cat. no. P4707-50ML; MilliporeSigma) and washed with phosphate-buffered saline (PBS) three times. RD and Rh30 cells were plated at a density of  $1.0 \times 10^5$  cells/well in 200  $\mu$ l culture media. After 24 h of

incubation at 37°C, the slides were rinsed lightly with 0.1% PBS containing Tween-20, fixed with 4% paraformaldehyde (Nacalai Tesque, Inc.) for 10 min at room temperature, and washed three times with ice-cold PBS (5 min/wash). The subsequent steps were performed as for immunohistochemical staining.

Figure S1. Human vimentin antibodies reacted only with human rhabdomyosarcoma cell lines, not chicken tissues. (A) Immunocytochemical staining of anti-human vimentin in RD and Rh30 cell lines. The cells were counterstained with methyl green. (B) Hematoxylin and eosin staining (left) and immunohistochemical staining of anti-human vimentin (right) in the chick muscle tissue. Sections were counterstained with methyl green. Staining caused by a non-specific reaction was not observed.

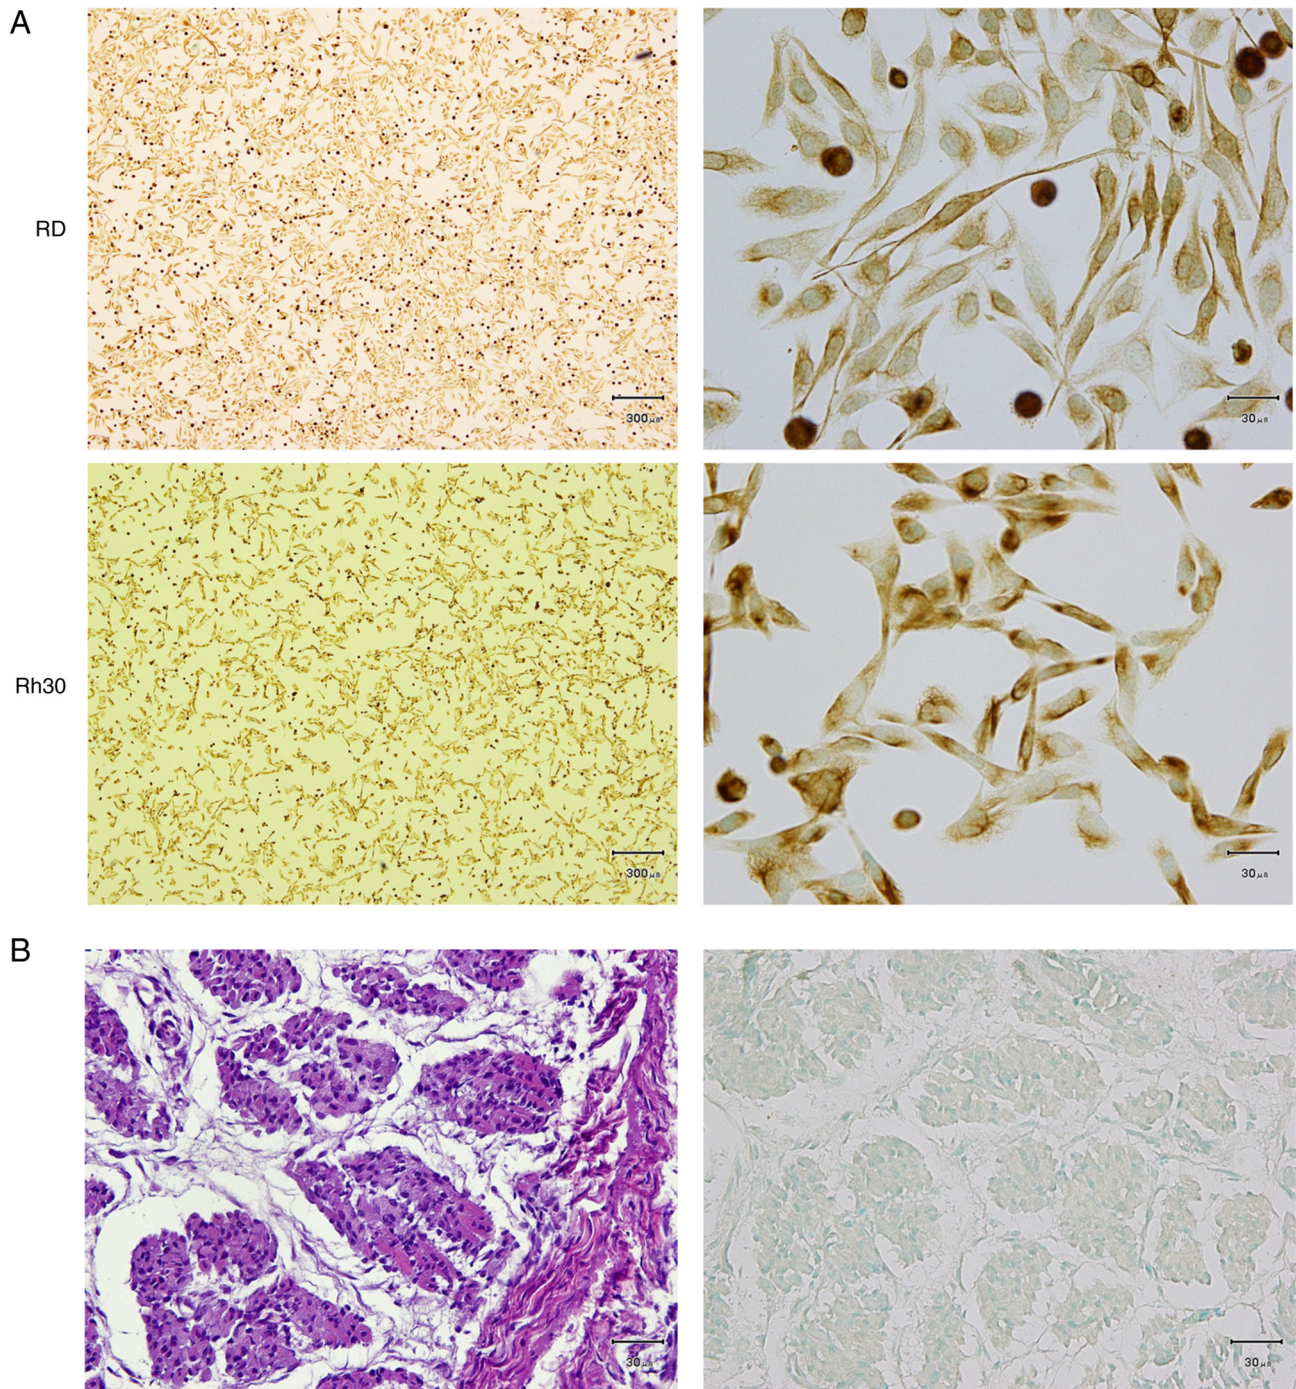

Supplement: Supplementary_Data.pdf [file Supplementary_Data.pdf]
